# Supplementary material for: Mass production of chemicals from biomass-derived oil by directly atmospheric distillation coupled with co-pyrolysis
Source: PubMed Central journal article supplement — Sci Rep. 2013 Jan 24;3:1120. doi: 10.1038/srep01120 (PMC3553461; doi:10.1038/srep01120), 2013-01-24
Supplement: srep01120-s1.pdf [file srep01120-s1.pdf]

## Supplementary Materials

### **Mass production of chemicals from biomass-derived oil by directly atmospheric distillation coupled with co-pyrolysis**

Xue-Song Zhang, Guang-Xi Yang, Hong Jiang\*, Wu-Jun Liu & Hong-Sheng Ding

Department of Chemistry, University of Science and Technology of China, Hefei

230026, China

\* To whom correspondence should be addressed. E-mail: [jhong@ustc.edu.cn](mailto:jhong@ustc.edu.cn) (H. Jiang)

**The following is included as the supplementary information for this paper**

## Supplementary Methods

**Quantification of analytes by GC-FID.** Quantification of selected components of distillate and distillate fractions was performed on a gas chromatograph (GC-1690, KeXiao Co., Hangzhou, China) equipped with a moderately polar OV-1701 capillary column (30 m × 0.32 mm i.d., film thickness 1.00 μm ) and a hydrogen flame ionization detector (FID). The oven temperature was held at 313 K for 12 min, and programmed to ramp at 4 K/min to 453 K and then at 10 K/min to 523 K. The temperature of both injector and FID was set at 523 K. Distillate samples were prepared as ca. 5 wt.% solutions in absolute ethanol and each time 1 μL of the sample was injected. Chromatographic peaks were identified by comparing their retention time with that of authentic compounds. 1-bromobenzene was used as the internal standard (IS) for quantification.

**Calculation of the relative response factors (RRF).** The response factors of individual compounds relative to the IS, 1-bromobenzene, were determined by preparing and injecting samples containing known amounts of both analytes and bromobenzene. Each sample was analyzed for several times and the relative response factors for each analyte were given as the average values. The relative response factors of 13 selected analytes are listed in Supplementary Table S2. The relative response factors of analyte *i* is defined as

$$\text{RRF}_i = \frac{A_i/m_i}{A_{IS}/m_{IS}} \quad (1)$$

where  $A_i$  and  $A_{IS}$  stand for the peak areas of analyte *i* and IS on the chromatogram, respectively; while  $m_i$  and  $m_{IS}$  represent the weight of analyte *i* and IS contained in the

sample.

## **List of Tables**

**Table S1** Identified compounds in bio-oils prepared from fast co-pyrolysis of ADR and rice husk

**Table S2** The relative response factors of analytes

**Table S3** Ultimate and proximate analyses of rice husk and ADR

**Table S4** Yield and separation efficiency of selected compounds in distillate

**Table S5** Calculation of total quantified carbon in whole distillate

**Table S6** Major compounds identified in distillate of bio-oil by GC/MS

**Table S7** Elemental analysis of raw bio-oil and its distillation products

**Table S1** Identified compounds in bio-oils prepared from fast co-pyrolysis of ADR and rice husk

| RT <sup>a</sup><br>(min) | Compounds                                              | Peak area (%)      |        |        |
|--------------------------|--------------------------------------------------------|--------------------|--------|--------|
|                          |                                                        | ADR-0 <sup>b</sup> | ADR-20 | ADR-35 |
| 3.39                     | formic acid                                            | 0.43               | 0.51   | 0.67   |
| 3.85                     | hydroxyacetaldehyde                                    | 0.51               | 0.19   | 0.51   |
| 4.23                     | acetic acid                                            | 7.39               | 6.78   | 6.08   |
| 5.27                     | acetol                                                 | 5.64               | 3.98   | 3.04   |
| 5.80                     | (1S,2R)-1,2-bis[(2R)-oxiran-2-yl]ethane-1,2-diol       | 0.46               | 0.19   | 0.17   |
| 6.04                     | propanoic acid                                         | 0.42               | 0.75   | 0.59   |
| 8.48                     | 1-hydroxy-2-butanone                                   | 0.74               | 0.55   | 0.50   |
| 9.31                     | methyl 2-oxopropanoate                                 | 1.18               | 0.91   | 0.60   |
| 9.92                     | diethoxymethyl acetate                                 | 1.00               | 0.91   | 0.89   |
| 11.09                    | furfural                                               | 2.92               | 3.05   | 2.57   |
| 12.01                    | furfuryl alcohol                                       | 2.92               | 2.00   | 1.53   |
| 12.60                    | 1-acetoxy-2-propanone                                  | 0.96               | 0.74   | 0.68   |
| 14.13                    | 2-methyl-2-cyclopenten-1-one                           | 0.76               | 0.99   | n.d.   |
| 14.32                    | 2(5 <i>H</i> )-furanone and/or 2(3 <i>H</i> )-furanone | 1.38               | 0.86   | 0.65   |
| 14.42                    | $\gamma$ -butyrolactone                                | 0.79               | 0.74   | 0.55   |
| 14.71                    | 2-cyclohexen-1-ol                                      | 0.36               | 0.31   | 0.17   |
| 14.98                    | 2-hydroxy-2-cyclopenten-1-one                          | 2.71               | 1.65   | 1.34   |
| 15.02                    | 5-methyl-2(5 <i>H</i> )-furanone                       | 0.29               | n.d.   | n.d.   |
| 15.15                    | 1-(3,3-dimethyloxiranyl)ethanone                       | n.d.               | 0.23   | 0.19   |
| 16.62                    | 5-methylfurfural                                       | 1.13               | 0.92   | 0.70   |
| 16.70                    | 3-methyl-2-cyclopenten-1-one                           | 0.80               | 0.77   | 0.67   |
| 17.28                    | phenol                                                 | 1.06               | 1.89   | 2.27   |
| 17.74                    | 2-hydroxy- $\gamma$ -butyrolactone                     | 0.51               | 0.45   | 0.48   |
| 18.08                    | 5-methyl-3-hexen-2-one                                 | 0.26               | 0.27   | 0.22   |
| 18.21                    | 1-{2-[2-(methylamino)propyl]phenyl}-1-propanone        | 0.47               | 0.42   | 0.33   |
| 19.17                    | 3-methyl-1,2-cyclopentanedione                         | 2.45               | 2.26   | 2.35   |
| 20.31                    | <i>o</i> -cresol                                       | 0.39               | 0.77   | 1.18   |
| 21.14                    | <i>p</i> -cresol                                       | 1.42               | 2.45   | 2.34   |
| 21.68                    | guaiacol                                               | 1.73               | 2.26   | 2.64   |
| 22.79                    | 3-ethyl-2-hydroxy-2-cyclopenten-1-one                  | 0.44               | 0.33   | 0.39   |
| 23.21                    | 1,4-dioxaspiro[2.4]heptan-5-one                        | 0.37               | 0.31   | 0.31   |
| 23.96                    | 2,4-dimethylphenol                                     | n.d.               | 0.33   | 0.54   |
| 24.31                    | 7-methyl-1,4-dioxaspiro[2.4]heptan-5-one               | 0.22               | 0.21   | 0.21   |

|       |                                                               |       |       |       |
|-------|---------------------------------------------------------------|-------|-------|-------|
| 24.38 | 6-methyl-1,4-dioxaspiro[2.4]heptan-5-one                      | 0.27  | 0.25  | 0.16  |
| 24.61 | 4-ethylphenol                                                 | 1.17  | 1.79  | 2.38  |
| 25.28 | 3,5-dihydroxy-2-methyl-4 <i>H</i> -pyran-4-one                | 0.29  | n.d.  | n.d.  |
| 25.40 | 5-(propan-2-yl)dihydrofuran-3(2 <i>H</i> )-one                | 0.50  | n.d.  | n.d.  |
| 25.53 | 1,2-benzenediol and 4-methylguaiacol                          | 2.34  | 5.66  | 7.56  |
| 26.29 | 1,4:3,6-dianhydro- $\alpha$ -D-glucopyranose                  | 0.50  | n.d.  | n.d.  |
| 26.47 | 2,3-dihydrobenzofuran                                         | 3.52  | 4.29  | 3.68  |
| 26.74 | hydroxymethylfurfural (HMF)                                   | 1.40  | 0.90  | 0.78  |
| 26.78 | 2,3-anhydro-D-galactosan and/or<br>3,4-anhydro-D-galactosan   | 1.26  | 0.54  | 0.31  |
| 26.93 | 2,3-anhydro-D-mannosan                                        | 0.18  | 0.97  | 0.80  |
| 27.15 | 2-ethyl-6-methylphenol                                        | n.d.  | 0.18  | 0.47  |
| 27.78 | 4-methyl-1,2-benzenediol                                      | n.d.  | 0.51  | 1.00  |
| 27.86 | 3-methoxy-1,2-benzenediol and/or<br>4-methoxy-1,2-benzenediol | n.d.  | 0.55  | 0.76  |
| 28.10 | 3-hydroxy-4,4-dimethyldihydrofuran-2(3<br><i>H</i> )-one      | 0.58  | 0.49  | 0.25  |
| 28.27 | Hydroquinone                                                  | n.d.  | 0.78  | 0.81  |
| 28.54 | 4-ethylguaiacol                                               | 0.83  | 1.16  | 1.51  |
| 28.81 | 4-methylcatechol                                              | 0.30  | 1.09  | 1.66  |
| 29.79 | 4-vinylguaiacol                                               | 2.27  | 1.89  | 1.89  |
| 30.34 | 1,2,4-cyclopentanetriol                                       | n.d.  | 0.20  | 0.24  |
| 30.71 | 4-(2-propenyl)phenol                                          | n.d.  | 0.59  | 0.67  |
| 30.96 | syringol                                                      | 0.58  | 0.92  | 1.15  |
| 31.16 | 6-allylguaiacol                                               | 0.15  | 0.62  | 0.78  |
| 31.50 | 4-propylguaiacol                                              | n.d.  | n.d.  | 0.55  |
| 31.88 | 6-ethylresorcinol                                             | 0.49  | 0.98  | 1.51  |
| 32.53 | vanillin lactoside                                            | 0.40  | 0.23  | n.d.  |
| 32.70 | 2,5-dimethylbenzene-1,4-diol                                  | n.d.  | 0.14  | 0.16  |
| 32.81 | 3-allyl-6-methoxyphenol                                       | 0.15  | 0.20  | 0.21  |
| 33.94 | 1,2,3-trimethoxybenzene                                       | 0.26  | 0.35  | 0.43  |
| 34.18 | isoeugenol                                                    | 0.91  | 1.04  | 1.17  |
| 35.08 | 4-ethyl-1,2-dimethoxybenzene                                  | 0.18  | n.d.  | n.d.  |
| 35.22 | 1-(4-hydroxy-3-methoxyphenyl)ethanone                         | n.d.  | 0.41  | 0.56  |
| 35.80 | 1,6-anhydro- $\beta$ -D-glucopyranose<br>(levoglucosan)       | 18.56 | 16.52 | 12.41 |
| 36.23 | 6-hydroxy-3,4-dihydro-2 <i>H</i> -chromen-2-one               | n.d.  | 0.30  | 0.29  |
| 36.46 | 1-(4-hydroxy-3-methoxyphenyl)propan-2-one                     | 0.23  | 0.32  | 0.40  |
| 36.92 | 3,4-altrosan                                                  | 1.11  | 1.46  | 1.57  |
| 37.40 | 2-(3,4-dimethoxyphenyl)-6-methyl-3,4-chromanediol             | 0.39  | n.d.  | n.d.  |
| 37.50 | 4-methyl-2,5-dimethoxybenzaldehyde                            | n.d.  | 0.40  | 0.42  |

|       |                                                                 |      |      |      |
|-------|-----------------------------------------------------------------|------|------|------|
| 38.25 | 2,3-anhydro-d-galactosan                                        | 0.44 | 1.04 | n.d. |
| 38.36 | 1,6-anhydro- $\alpha$ -d-galactofuranose                        | 0.35 | n.d. | 1.00 |
| 38.50 | 3-methoxy-2-methyl-5-(propan-2-yl)cyclohexa-2,5-diene-1,4-dione | n.d. | 0.21 | 0.13 |
| 39.85 | 4-(4-hydroxy-3-methoxyphenyl)butan-2-one                        | n.d. | 0.13 | n.d. |
| 41.21 | 4-allyl-2,6-dimethoxyphenol                                     | 0.46 | 0.39 | 0.41 |
| 41.81 | acetosyringone                                                  | n.d. | 0.24 | 0.31 |
| 42.49 | 1-(2,4,6-trihydroxyphenyl)pentan-2-one                          | n.d. | 0.15 | 0.19 |
| 45.46 | <i>n</i> -hexadecanoic acid                                     | 3.03 | 1.48 | 1.13 |
| 47.47 | oleic acid                                                      | 2.24 | 0.72 | 0.68 |

<sup>a</sup> Retention time. <sup>b</sup> ADR-x stands for ADR content in feedstock (x wt.%).

---

---

**Table S2** The relative response factors of analytes

---

| Analyte                | RRF   |
|------------------------|-------|
| 2,3-Butanedione        | 0.759 |
| 2-Butanone             | 1.092 |
| Acetic acid            | 0.390 |
| 2,3-Pentanedione       | 0.808 |
| Acetol                 | 0.597 |
| Propanoic acid         | 0.391 |
| Furfural               | 0.845 |
| <i>n</i> -Butyric acid | 0.473 |
| Furfuryl alcohol       | 1.013 |
| Phenol                 | 1.637 |
| Guaiacol               | 1.166 |
| <i>o</i> -Cresol       | 1.540 |
| <i>p</i> -Cresol       | 1.598 |

---

---

**Table S3** Ultimate and proximate analyses of rice husk and ADR

---

|                                         | Rice husk | ADR   |
|-----------------------------------------|-----------|-------|
| Ultimate analysis (wt.%, on dry basis)  |           |       |
| C                                       | 38.26     | 66.10 |
| H                                       | 5.74      | 5.81  |
| N                                       | 1.14      | 1.01  |
| O <sup>a</sup>                          | 54.86     | 27.08 |
| Proximate analysis (wt.%, on dry basis) |           |       |
| Volatile matter                         | 67.91     | 61.03 |
| Fixed carbon                            | 19.63     | 38.47 |
| Ash                                     | 12.45     | 0.51  |

<sup>a</sup> By difference.

---



**Table S4** Yield and separation efficiency of selected compounds in distillate

|                              | Acetic acid | Acetol      | Propanoic acid | Furfural    | n-Butyric acid | Furfuryl alcohol | Phenol    | Guaiacol    | <i>o</i> -Cresol | <i>p</i> -Cresol |
|------------------------------|-------------|-------------|----------------|-------------|----------------|------------------|-----------|-------------|------------------|------------------|
| Formula                      | $C_2H_4O_2$ | $C_3H_6O_2$ | $C_3H_6O_2$    | $C_5H_4O_2$ | $C_4H_8O_2$    | $C_5H_6O_2$      | $C_6H_6O$ | $C_7H_8O_2$ | $C_7H_8O$        | $C_7H_8O$        |
| Boiling point (K)            | 391         | 418         | 414            | 435         | 437            | 443              | 455       | 478         | 464              | 475              |
| Yield (wt% of raw bio-oil)   |             |             |                |             |                |                  |           |             |                  |                  |
| Fraction 1                   | 1.809       | 0.717       | 0.244          | 0.129       | 0.021          | 0.062            | 0.025     | 0.042       | 0.010            | 0.008            |
| Fraction 2                   | 0.902       | 0.319       | 0.110          | 0.021       | 0.014          | 0.020            | 0.007     | 0.012       | 0.003            | 0.004            |
| Fraction 3                   | 0.465       | 0.148       | 0.056          | 0.009       | 0.008          | 0.011            | 0.004     | 0.006       | 0.001            | 0.003            |
| Fraction 4                   | 0.552       | 0.189       | 0.066          | 0.013       | 0.009          | 0.015            | 0.005     | 0.008       | 0.002            | 0.003            |
| Fraction 5                   | 0.943       | 0.253       | 0.128          | 0.017       | 0.021          | 0.032            | 0.009     | 0.015       | 0.004            | 0.006            |
| Fraction 6                   | 0.402       | 0.046       | 0.065          | 0.002       | 0.008          | 0.023            | 0.009     | 0.015       | 0.003            | 0.005            |
| Whole distillate             | 5.072       | 1.672       | 0.668          | 0.192       | 0.082          | 0.163            | 0.058     | 0.097       | 0.023            | 0.029            |
| Concentration in Raw bio-oil | 5.742       | 2.711       | 0.728          | 0.226       | 0.135          | 0.299            | 0.157     | 0.239       | 0.045            | 0.108            |
| Separation efficiency (%)    |             |             |                |             |                |                  |           |             |                  |                  |
| Whole distillate             | 88.34       | 61.67       | 91.80          | 85.11       | 60.75          | 54.39            | 37.12     | 40.76       | 50.68            | 26.65            |

| <b>Table S5</b> Calculation of total quantified carbon in whole distillate |                                              |                |                                                 |                                                             |
|----------------------------------------------------------------------------|----------------------------------------------|----------------|-------------------------------------------------|-------------------------------------------------------------|
|                                                                            | Formula                                      | Carbon content | Yield in whole distillate<br>wt% of raw bio-oil | Quantified carbon in whole distillate<br>wt% of raw bio-oil |
| Acetic acid                                                                | C <sub>2</sub> H <sub>4</sub> O <sub>2</sub> | 0.400          | 5.072                                           | 2.029                                                       |
| Acetol                                                                     | C <sub>3</sub> H <sub>6</sub> O <sub>2</sub> | 0.486          | 1.672                                           | 0.813                                                       |
| Propanoic acid                                                             | C <sub>3</sub> H <sub>6</sub> O <sub>2</sub> | 0.486          | 0.668                                           | 0.325                                                       |
| Furfural                                                                   | C <sub>5</sub> H <sub>4</sub> O <sub>2</sub> | 0.625          | 0.192                                           | 0.120                                                       |
| <i>n</i> -Butyric acid                                                     | C <sub>4</sub> H <sub>8</sub> O <sub>2</sub> | 0.545          | 0.082                                           | 0.045                                                       |
| Furfuryl alcohol                                                           | C <sub>5</sub> H <sub>6</sub> O <sub>2</sub> | 0.612          | 0.163                                           | 0.100                                                       |
| Phenol                                                                     | C <sub>6</sub> H <sub>6</sub> O              | 0.766          | 0.058                                           | 0.045                                                       |
| Guaiacol                                                                   | C <sub>7</sub> H <sub>8</sub> O <sub>2</sub> | 0.677          | 0.097                                           | 0.066                                                       |
| <i>o</i> -Cresol                                                           | C <sub>7</sub> H <sub>8</sub> O              | 0.778          | 0.023                                           | 0.018                                                       |
| <i>p</i> -Cresol                                                           | C <sub>7</sub> H <sub>8</sub> O              | 0.778          | 0.029                                           | 0.022                                                       |
| 2,3-Butanedione                                                            | C <sub>4</sub> H <sub>6</sub> O <sub>2</sub> | 0.558          | 0.107                                           | 0.060                                                       |
| 2-Butanone                                                                 | C <sub>4</sub> H <sub>8</sub> O              | 0.667          | 0.142                                           | 0.095                                                       |
| 2,3-Pentanedione                                                           | C <sub>5</sub> H <sub>8</sub> O <sub>2</sub> | 0.600          | 0.039                                           | 0.023                                                       |
| Total quantified carbon                                                    |                                              |                |                                                 | 3.761                                                       |

**Table S6** Major compounds identified in distillate of bio-oil by GC/MS<sup>a</sup>

| Entries | RT (min) <sup>b</sup> | Compounds                      | Formula                                       | b.p. (K) <sup>c</sup> |
|---------|-----------------------|--------------------------------|-----------------------------------------------|-----------------------|
| 1       | 3.92                  | 2,3-butanedione                | C <sub>4</sub> H <sub>6</sub> O <sub>2</sub>  | 361                   |
| 2       | 4.00                  | 2-butanone                     | C <sub>4</sub> H <sub>8</sub> O               | 353                   |
| 3       | 4.23                  | acetic acid                    | C <sub>2</sub> H <sub>4</sub> O <sub>2</sub>  | 391                   |
| 4       | 5.27                  | acetol                         | C <sub>3</sub> H <sub>6</sub> O <sub>2</sub>  | 418                   |
| 5       | 6.07                  | 2,3-pentanedione               | C <sub>5</sub> H <sub>8</sub> O <sub>2</sub>  | 383                   |
| 6       | 7.37                  | 3-penten-2-one                 | C <sub>5</sub> H <sub>8</sub> O               | 392                   |
| 7       | 8.48                  | 1-hydroxy-2-butanone           | C <sub>4</sub> H <sub>8</sub> O <sub>2</sub>  | 425                   |
| 8       | 9.31                  | methyl<br>2-oxopropanoate      | C <sub>4</sub> H <sub>6</sub> O <sub>3</sub>  | 409                   |
| 9       | 11.09                 | furfural                       | C <sub>5</sub> H <sub>4</sub> O <sub>2</sub>  | 435                   |
| 10      | 12.01                 | furfuryl alcohol               | C <sub>5</sub> H <sub>6</sub> O <sub>2</sub>  | 443                   |
| 11      | 12.60                 | 1-acetoxy-2-propanone          | C <sub>5</sub> H <sub>8</sub> O <sub>3</sub>  | 448                   |
| 12      | 14.13                 | 2-methyl-2-cyclopentane-1-one  | C <sub>6</sub> H <sub>8</sub> O               | 430                   |
| 13      | 14.50                 | 1-(2-furanyl)-ethanone         | C <sub>6</sub> H <sub>6</sub> O <sub>2</sub>  | 456                   |
| 14      | 16.62                 | 5-methylfurfural               | C <sub>6</sub> H <sub>6</sub> O <sub>2</sub>  | 460                   |
| 15      | 16.70                 | 3-methyl-2-cyclopentane-1-one  | C <sub>6</sub> H <sub>8</sub> O               | 431                   |
| 16      | 16.80                 | 1-acetoxy-2-butanone           | C <sub>6</sub> H <sub>10</sub> O <sub>3</sub> | 444                   |
| 17      | 17.28                 | phenol                         | C <sub>6</sub> H <sub>6</sub> O               | 455                   |
| 18      | 19.17                 | 3-methyl-1,2-cyclopentanedione | C <sub>6</sub> H <sub>8</sub> O <sub>2</sub>  | 518                   |
| 19      | 20.31                 | <i>o</i> -cresol               | C <sub>7</sub> H <sub>8</sub> O               | 464                   |
| 20      | 21.14                 | <i>p</i> -cresol               | C <sub>7</sub> H <sub>8</sub> O               | 475                   |
| 21      | 21.68                 | guaiacol                       | C <sub>7</sub> H <sub>8</sub> O <sub>2</sub>  | 478                   |
| 22      | 24.61                 | 4-ethylphenol                  | C <sub>8</sub> H <sub>10</sub> O              | 492                   |
| 23      | 25.53                 | 4-methylguaiacol               | C <sub>8</sub> H <sub>10</sub> O <sub>2</sub> | 521                   |
| 24      | 28.54                 | 4-ethylguaiacol                | C <sub>9</sub> H <sub>12</sub> O <sub>2</sub> | 520                   |

<sup>a</sup> Only peaks whose peak area percentage above 1% were listed, propanoic acid and *n*-butyric acid were also detected but not listed for their little response on non-polar columns. <sup>b</sup> Retention time. <sup>c</sup> Boiling point (at 760 mm Hg).

| <b>Table S7</b> Elemental analysis of raw bio-oil and its distillation products |           |                           |      |                |      |
|---------------------------------------------------------------------------------|-----------|---------------------------|------|----------------|------|
|                                                                                 | Yield (%) | Elemental analysis (wt.%) |      |                |      |
|                                                                                 |           | C <sup>a</sup>            | H    | O <sup>b</sup> | N    |
| Raw bio-oil                                                                     | 100       | 39.80                     | 7.73 | 51.55          | 0.92 |
| Whole distillate                                                                | 51.86     | 13.32                     | 9.80 | 75.98          | 0.90 |
| ADR <sup>c</sup>                                                                | 48.14     | 66.10                     | 5.81 | 27.08          | 1.01 |

<sup>a</sup> Mass balance closure of C atom was 97%. <sup>b</sup> By difference. <sup>c</sup> On dry basis.

## List of Figures

**Figure S1** The integrated process combining co-pyrolysis and atmospheric distillation for conversion of lignocellulosic biomass into chemicals.

**Figure S2** Product yields versus content of atmospheric distillation residue (ADR) in feedstock in fast co-pyrolysis of rice husk and ADR.

**Figure S3** Excitation-emission matrix (EEM) fluorescence spectra of the bio-oils prepared from fast co-pyrolysis of ADR and rice husk at 723 K.

**Figure S4** GC/MS chromatogram of raw bio-oil.

**Figure S5** GC/MS chromatogram of distillate.

**Figure S6** GC chromatograms of distillate Fraction I.

**Figure S7** GC chromatograms of distillate Fraction II.

**Figure S8** GC chromatograms of distillate Fraction III.

**Figure S9** GC chromatograms of distillate Fraction IV.

**Figure S10** GC chromatograms of distillate Fraction V.

**Figure S11** Optical image of ADR in powder form.

**Figure S12** FTIR spectrum of ADR.

**Figure S13** Schematic of the integrated co-pyrolysis-atmospheric distillation process with mass balance data.

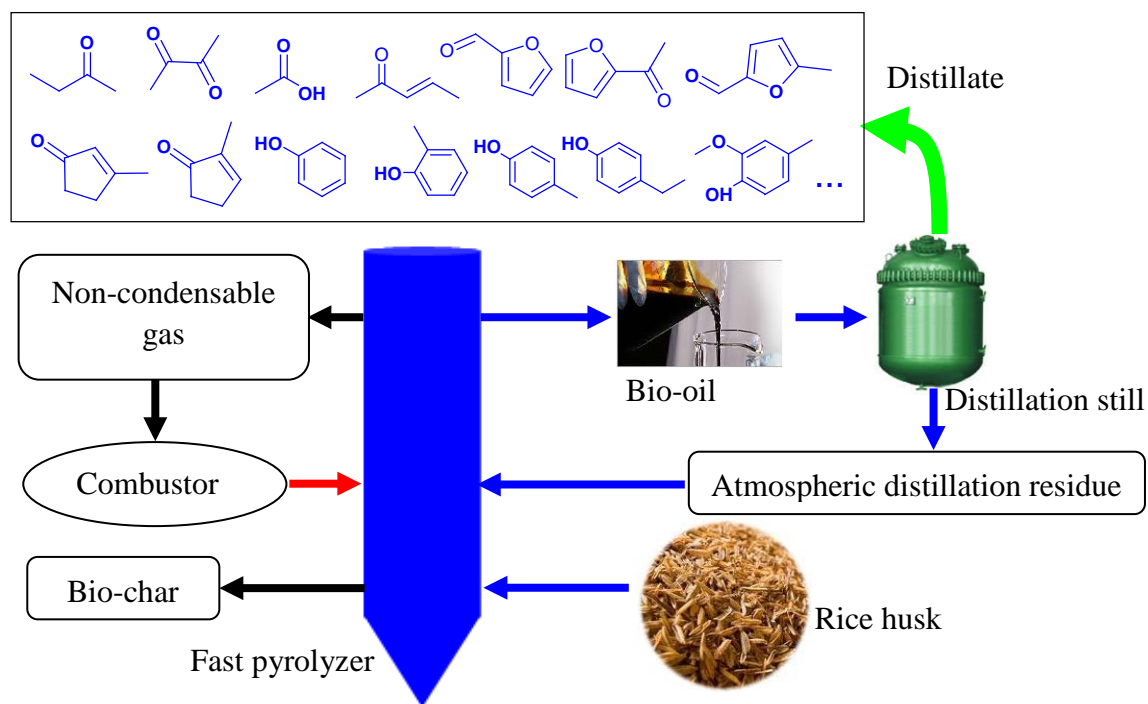

**Figure S1 The integrated process combining co-pyrolysis and atmospheric distillation for conversion of lignocellulosic biomass into chemicals.**

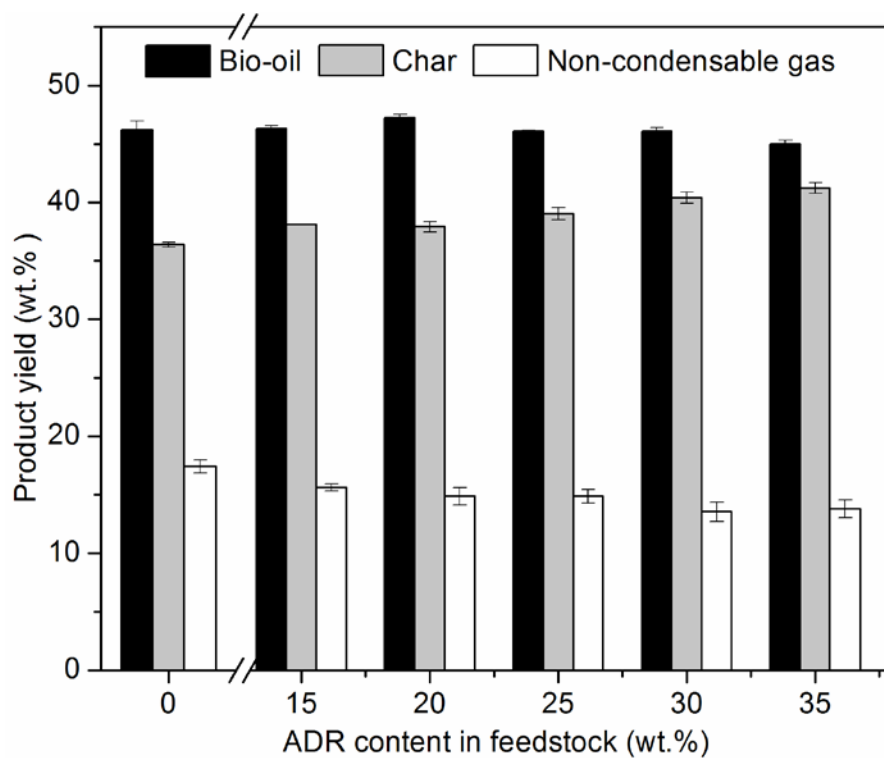

**Figure S2 Product yields versus content of atmospheric distillation residue (ADR) in feedstock in fast co-pyrolysis of rice husk and ADR.** Mixture of rice husk and ADR at different blending ratios was pyrolyzed at 723 K.

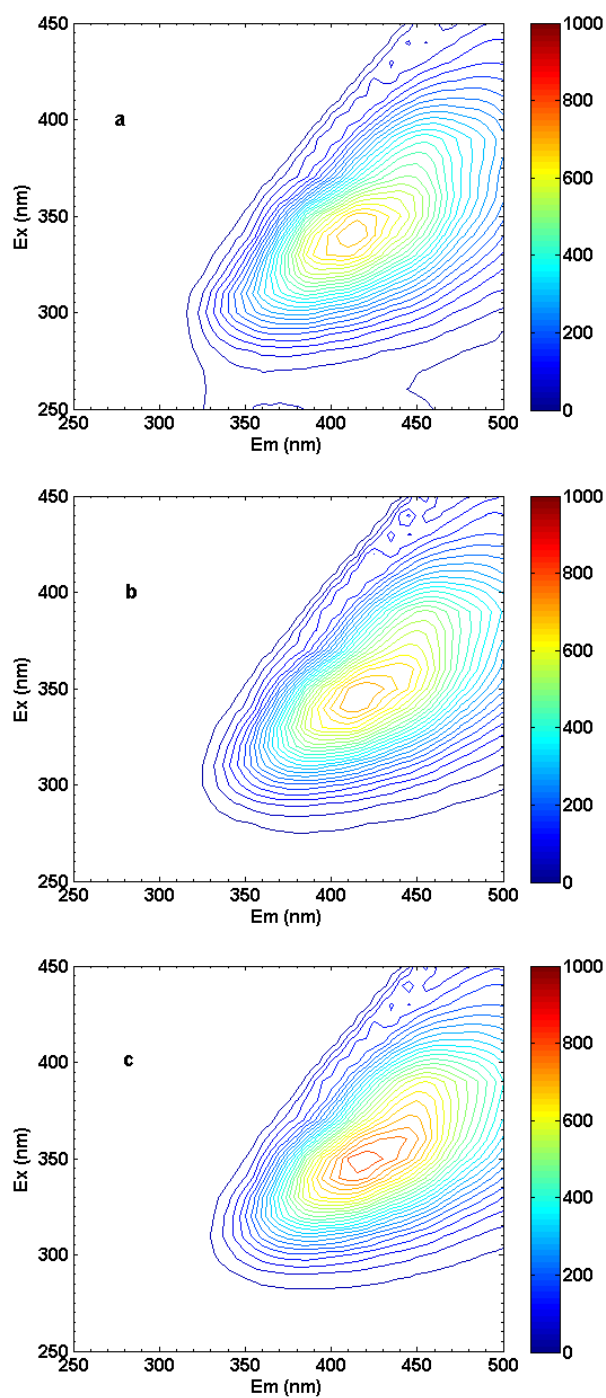

**Figure S3 Excitation-emission matrix (EEM) fluorescence spectra of the bio-oils prepared from fast co-pyrolysis of ADR and rice husk at 723 K. (a) ADR content in feedstock: 0; (b) ADR content: 20 wt.%; and (c) ADR content: 35 wt.%.**



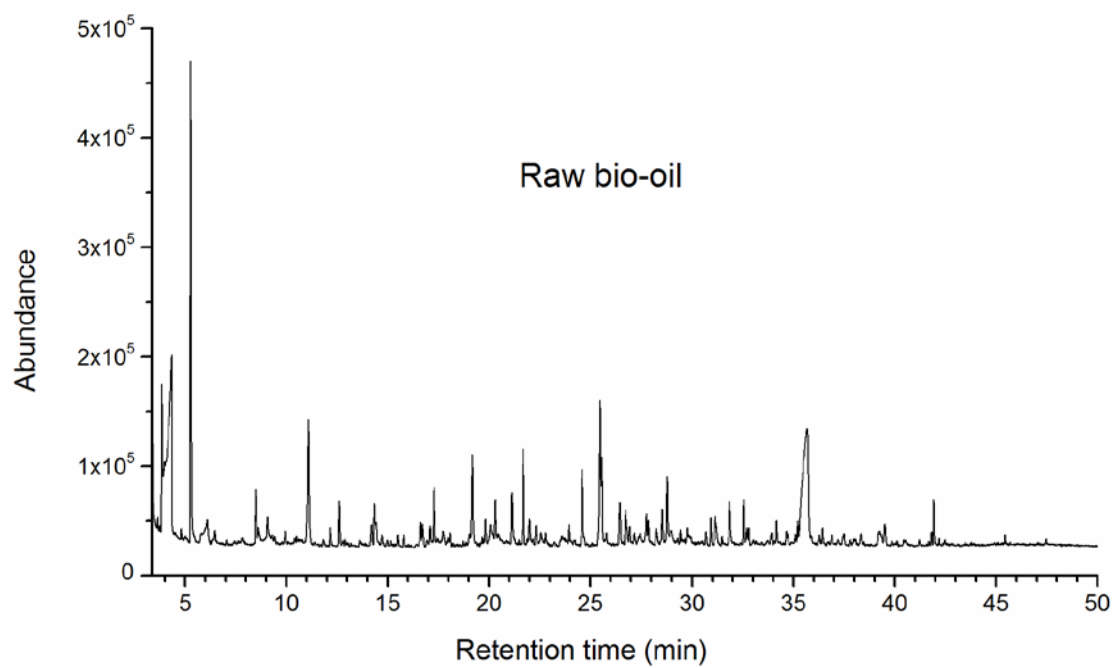

**Figure S4 GC/MS chromatogram of raw bio-oil.**

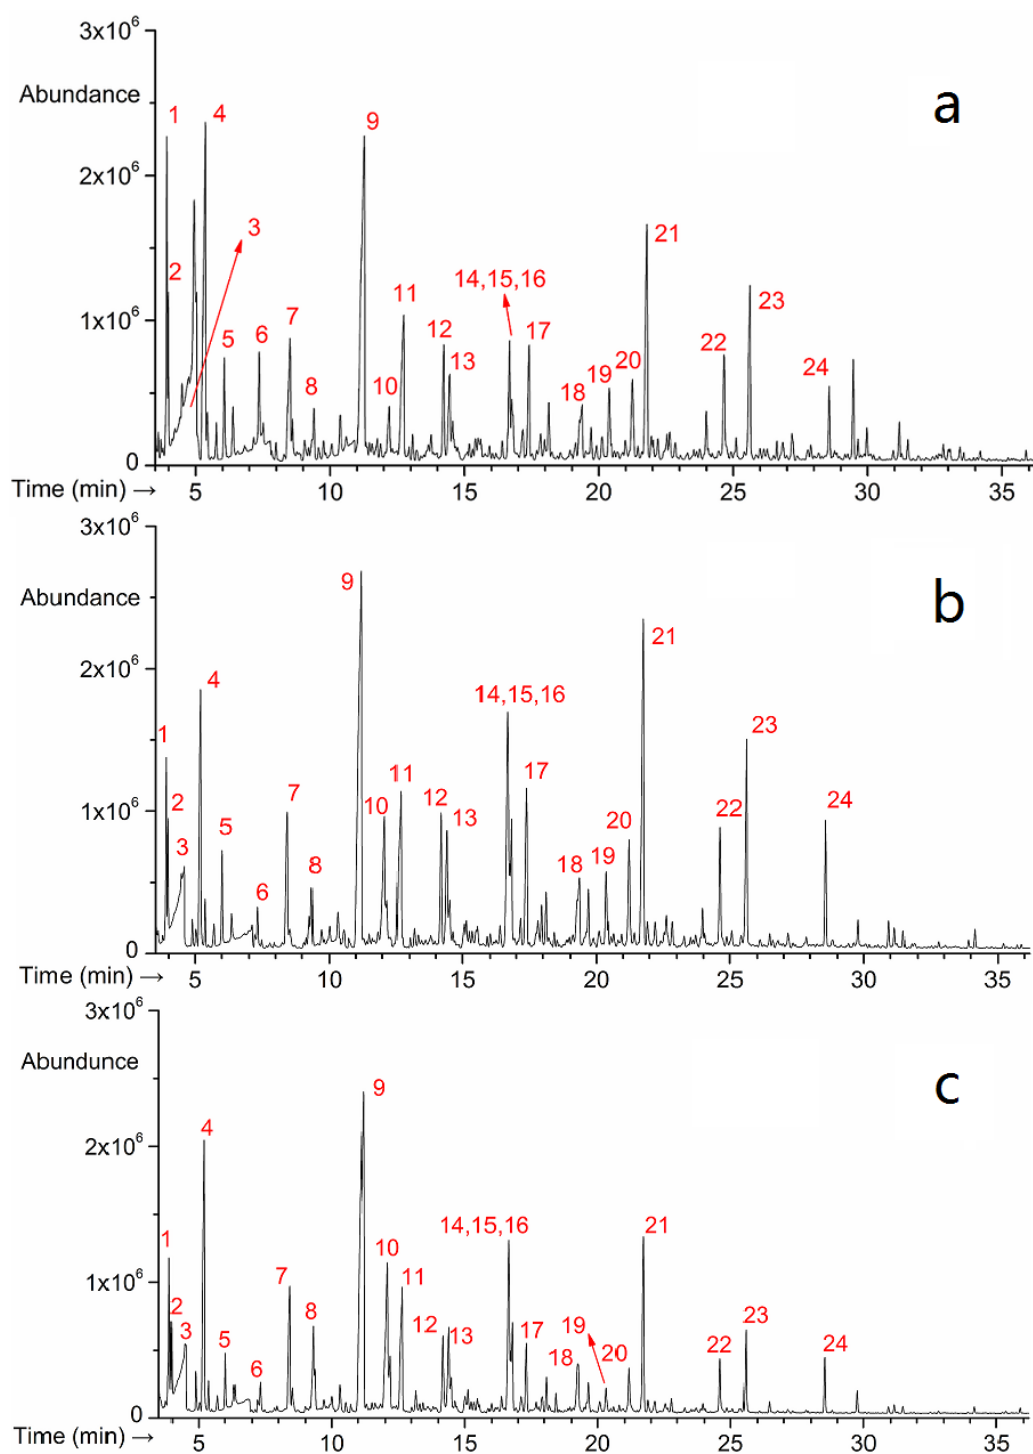

**Figure S5 GC/MS chromatogram of distillate.** (a) Distillate from raw bio-oil (start-up of the integrated system); (b) Distillate from bio-oil produced by co-pyrolysis of rice husk and ADR (first run of the integrated system); (c) Distillate from bio-oil produced by co-pyrolysis of rice husk and secondary ADR (second run). Identified peaks are listed in Supplementary Table S6.

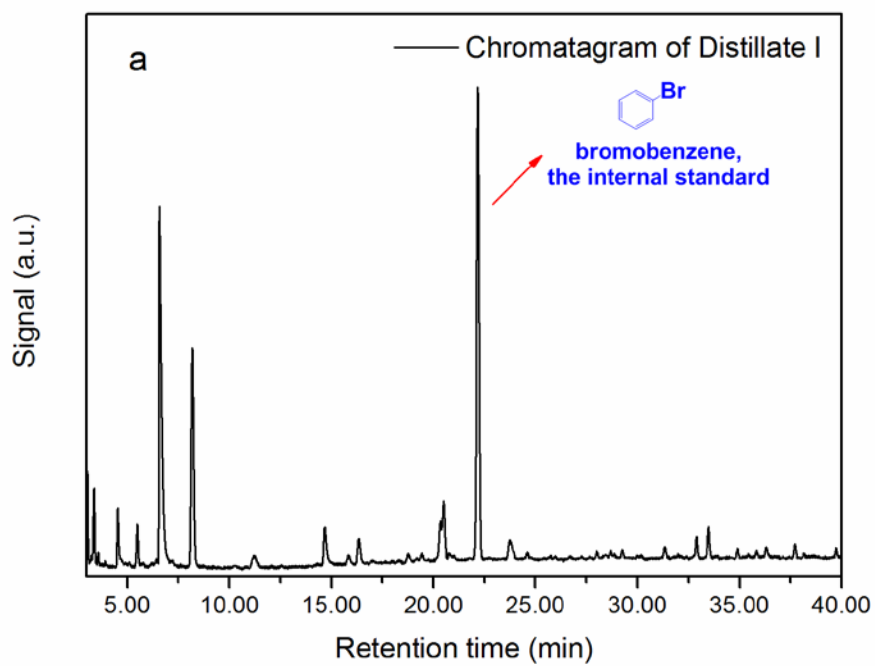

**Figure S6 GC chromatograms of distillate Fraction I.**

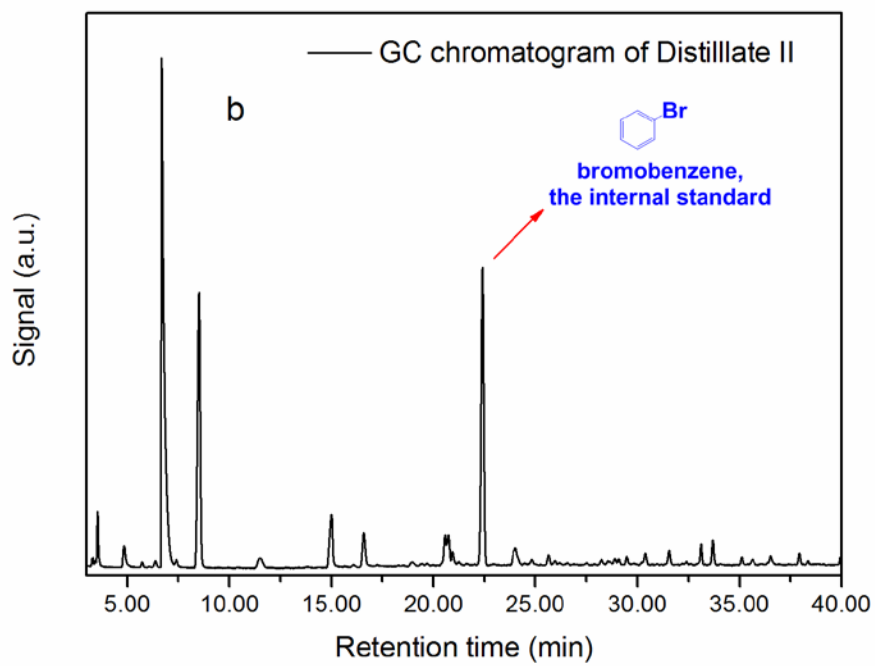

**Figure S7 GC chromatograms of distillate Fraction II.**

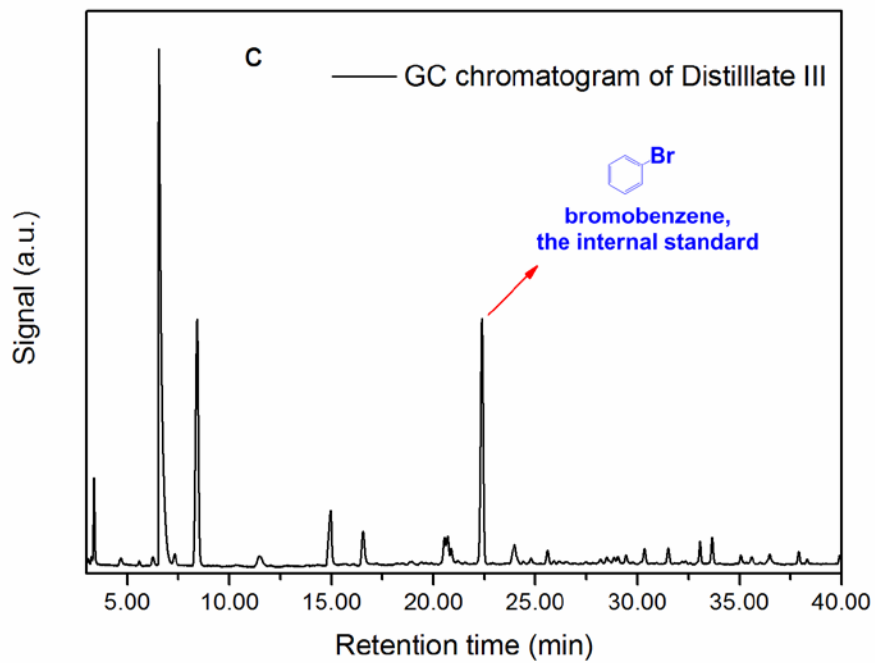

**Figure S8 GC chromatograms of distillate Fraction III.**

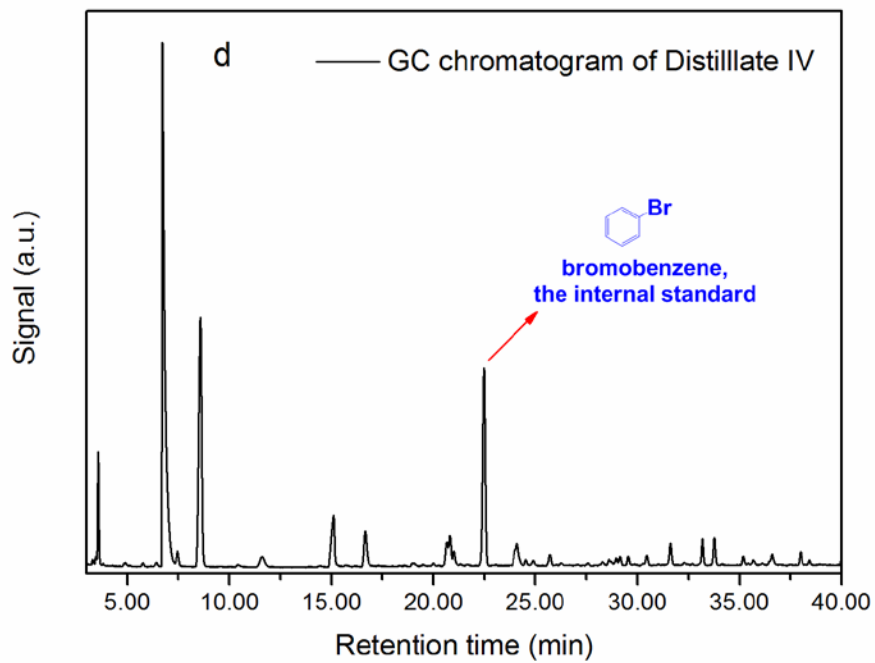

**Figure S9 GC chromatograms of distillate Fraction IV.**

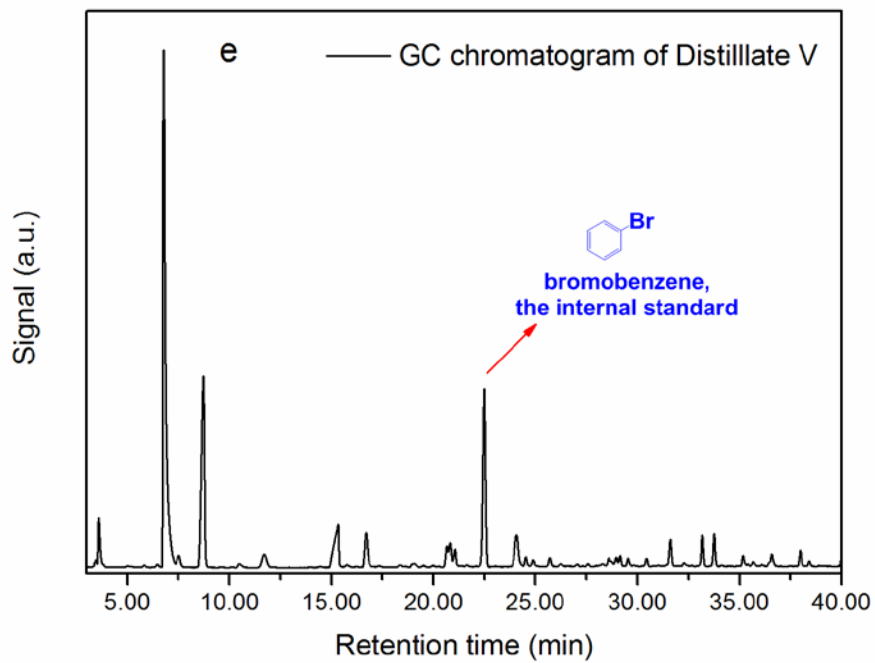

**Figure S10 GC chromatograms of distillate Fraction V.**

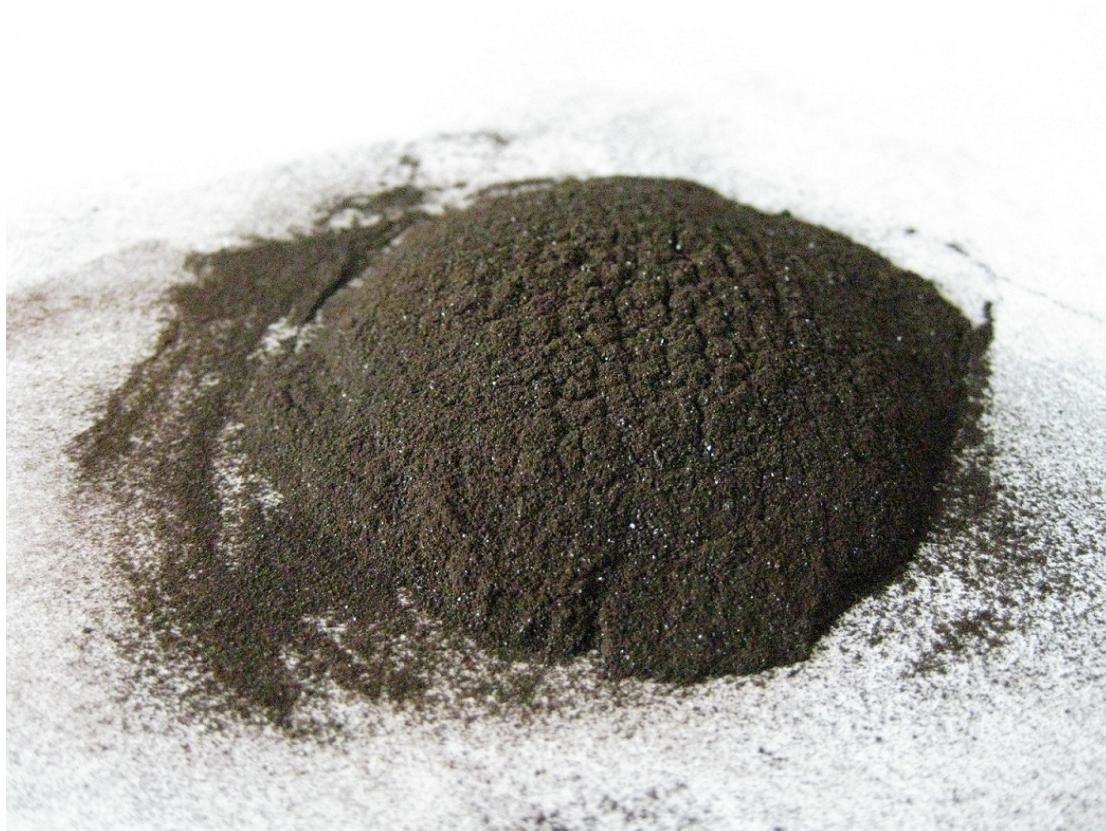

**Figure S11 Optical image of ADR in powder form.**



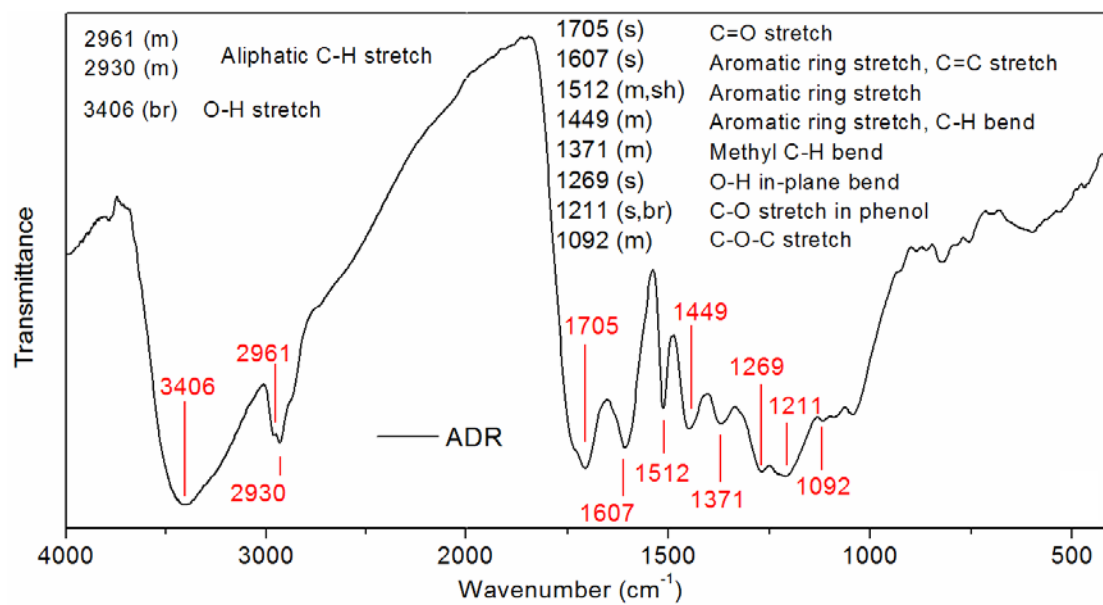

**Figure S12 FTIR spectrum of ADR.** Recorded at a resolution of 4 cm<sup>-1</sup> on an Equinox 55 infrared spectrometer (Bruker Optics GmbH, Germany) at room temperature by the KBr pellet method.

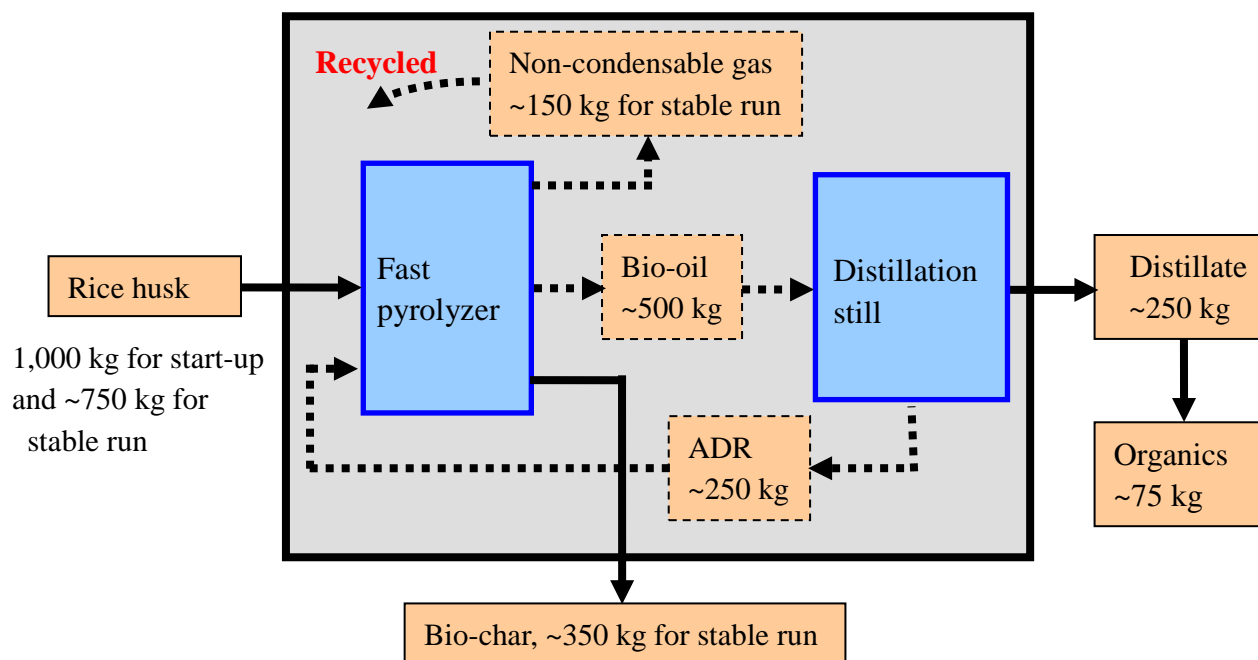

**Figure S13 Schematic of the integrated co-pyrolysis-atmospheric distillation process with mass balance data.**

## Supplementary Text

**Characteristics of atmospheric distillation residue (ADR).** The atmospheric distillation residue (ADR) inherited the irritant odor from bio-oil and was black solid in as-received form at room temperature (Fig. 2). When milled into powder, ADR showed brownish black color (Fig. S11). The FTIR spectrum (Fig. S12) of ADR reflected its oxygenated nature with strong absorption peaks of O-H and C=O moieties. The peaks at 1607, 1512, and 1449  $\text{cm}^{-1}$  were indicative of the existence of aromatic rings, while the peak at 1211  $\text{cm}^{-1}$  indicated that phenolic hydroxyl groups were contained, and the absorption at 1092  $\text{cm}^{-1}$  evidenced the existence of ether and/or ester linkage in ADR. In addition to aromatic rings, aliphatic moieties were also contained in ADR, as shown by the absorption peaks at 2961, 2930, and 1371  $\text{cm}^{-1}$ .

Ultimate and proximate analyses (Table S3) show that ADR had little ash content (0.51 wt%) and was carbon-rich (66.10 wt%). But its fixed carbon content was 38.47 wt%, twice that of rice husk, indicating that a larger proportion of carbon atoms in ADR would be left over to form bio-char in the pyrolysis process, compared with rice husk. The volatile matter content (61.03 wt%) of ADR was comparable to that of rice husk (67.91 wt%), suggesting that ADR might also be a suitable feedstock for fast pyrolysis as rice husk was.
